# Supplementary material for: Capping of oligonucleotides with “clickable” m3G-CAPs
Source: Royal Society of Chemistry journal article supplement (doi:10.1039/c2ra22345g), 2012-01-01

## Synthesis of “clickable” m<sub>3</sub>G-CAP analogues.

Malgorzata Honcharenko\*, Joanna Romanowska, Margarita Alvira, Martina Jezowska,  
Mikael Kjellgren, C. I. Edvard Smith and Roger Strömberg\*

### Supplementary information

1. Mass spectra of m<sub>3</sub>G-CAP constructs 1-4.
2. HPLC Chromatograms showing examples of crude reaction mixtures after capping of clickable mono and trinucleotides.
3. HPLC Chromatogram showing crude oligonucleotide (ON)-PATA conjugate.
4. Mass spectra of ON-PATA conjugate.
5. Additional HPLC Chromatograms showing examples of crude reaction mixtures after conjugation of the 18merRNA with the clickable m<sub>3</sub>G-CAP's.
6. Mass spectra of 18merRNA-m<sub>3</sub>G-CAP1-4 ON conjugates.
7. Mass spectra of 5'-phosphate-AUA(5)-ON conjugate.
8. Mass spectra of compounds 20 and 21.

## 1. Mass spectra of m<sub>3</sub>G-CAP analogues 1-4.

**m<sub>3</sub>G-CAP analogue 1:** (MS(ES<sup>+</sup>TOF) m/z) [M]<sup>+</sup> m/z calculated: 939.17, found: 938.82;

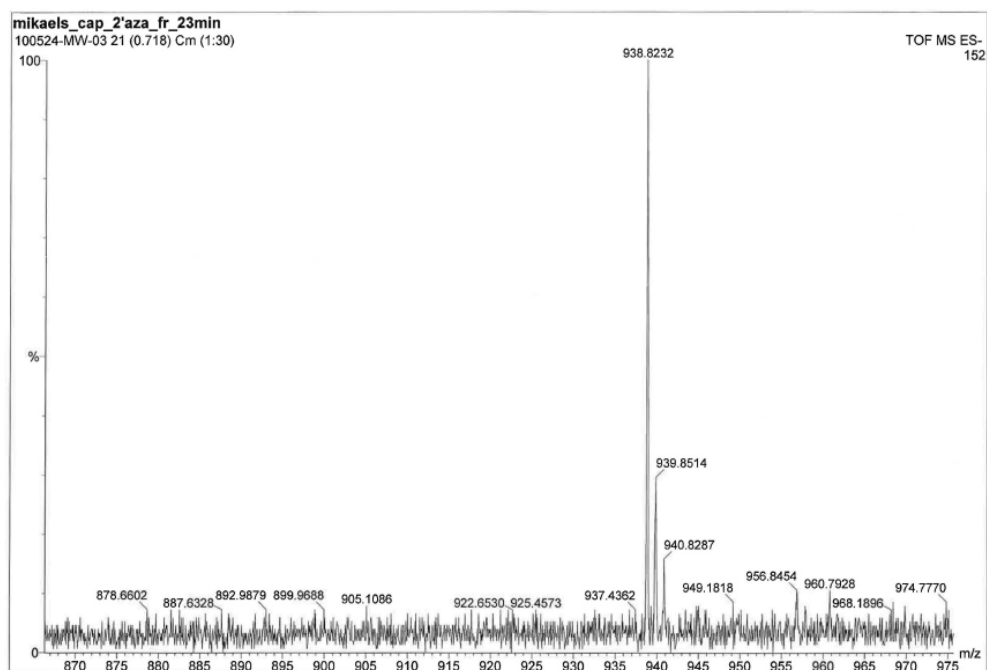

**m<sub>3</sub>G-CAP analogue 2:** (MS(ES<sup>+</sup>TOF) m/z) [M]<sup>+</sup> m/z calculated: 953.19, found: 953.56;

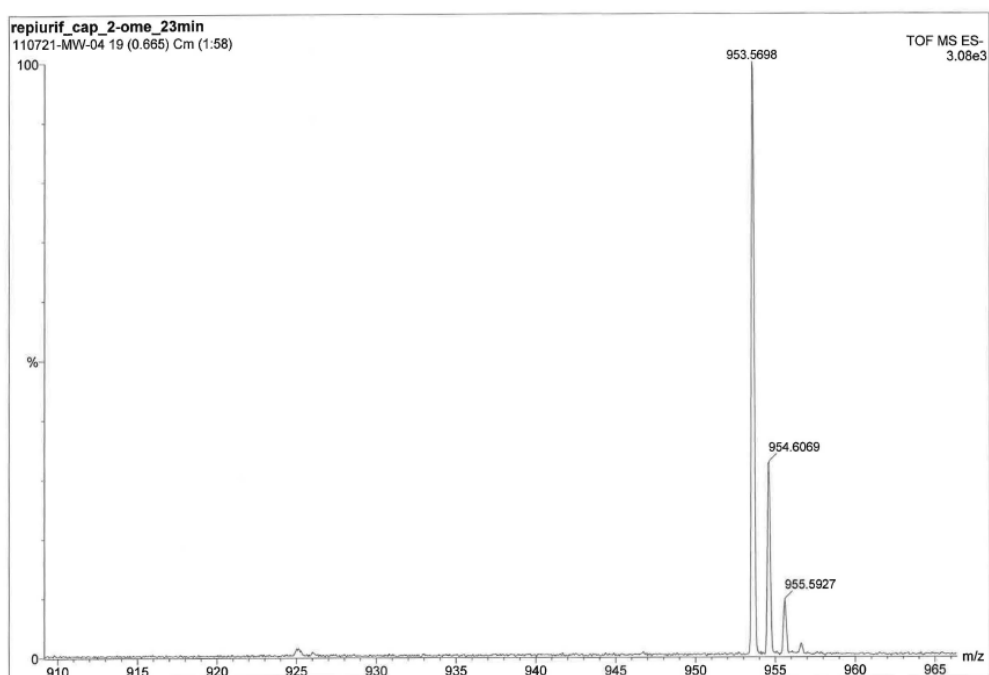

**m<sub>3</sub>G-CAP analogue 3:** (MS(ES<sup>+</sup>TOF) m/z) [M]<sup>-1</sup> m/z calculated: 1210.27, found: 1210.68;

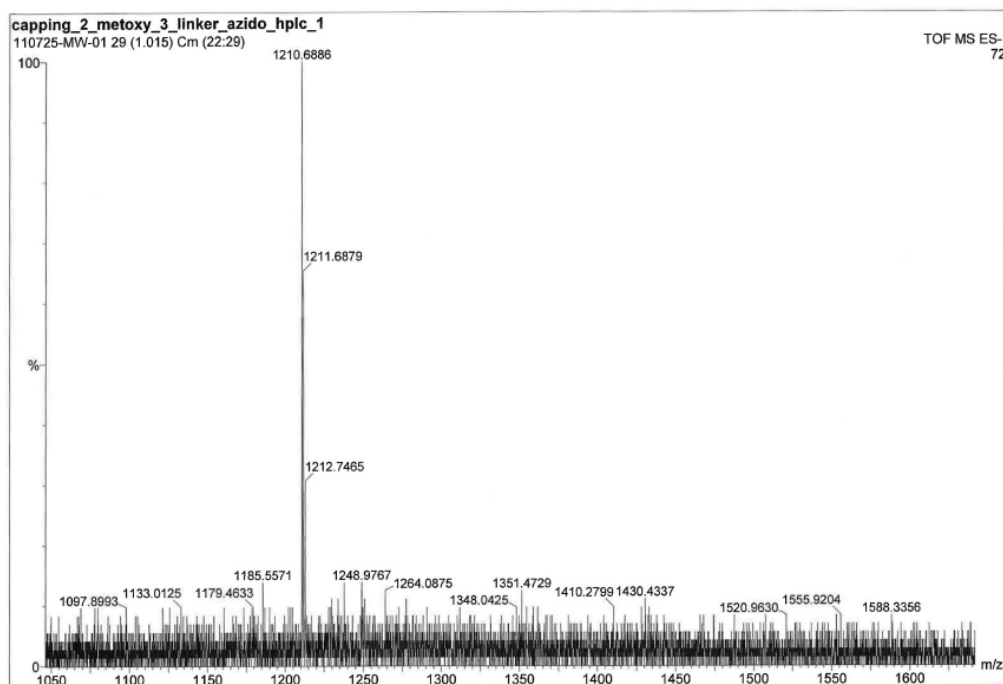

**m<sub>3</sub>G-CAP analogue 4:** (MS(ES<sup>+</sup>TOF) m/z) [M]<sup>-1</sup> m/z calculated: 1602.28 found: 1601.69;

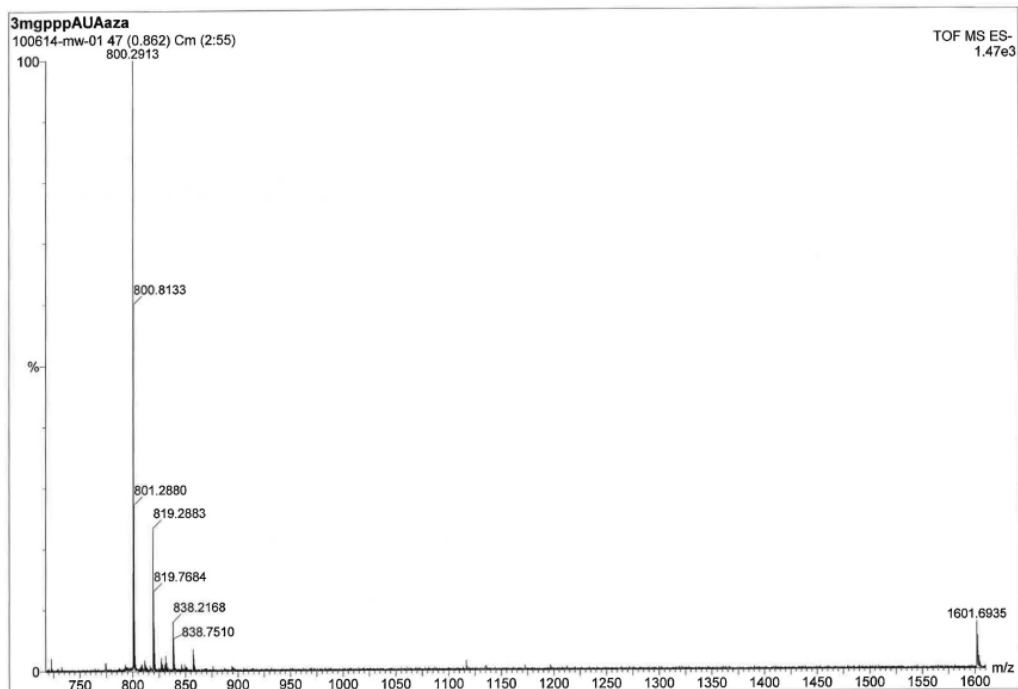

## 2. HPLC Chromatograms showing examples of crude reaction mixtures after capping of clickable mono and trinucleotides.

a) HPLC chromatogram of crude reaction mixture in synthesis of m3G-Cap construct 3.

a) HPLC chromatogram of crude reaction mixture in synthesis of m3G-Cap construct 4.

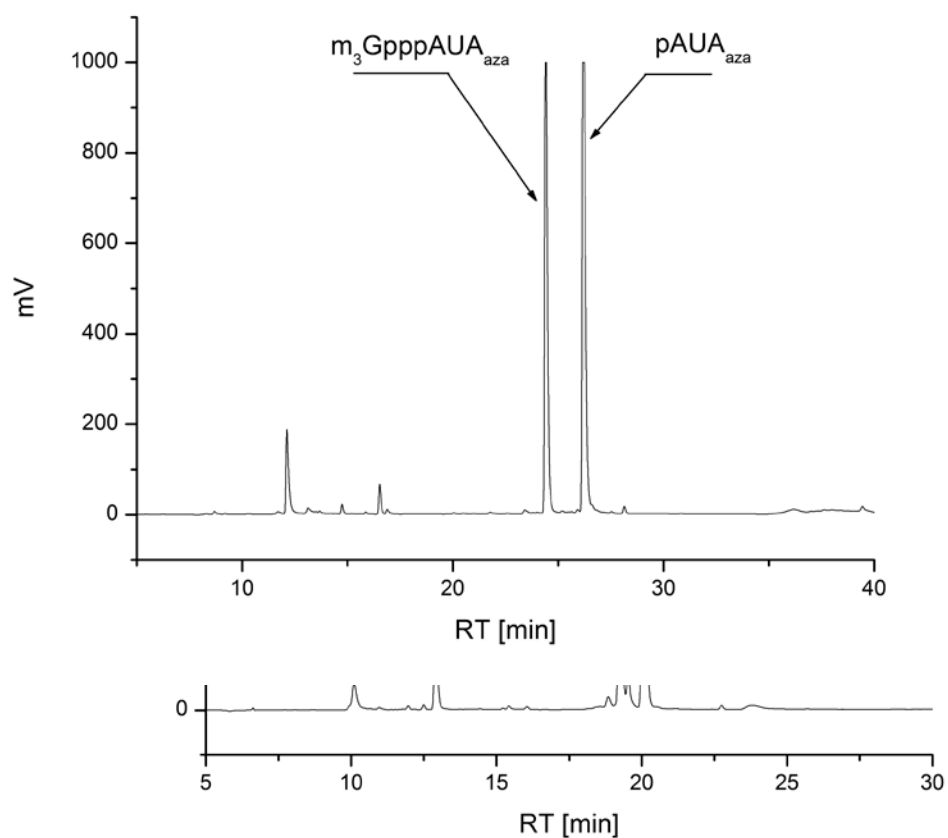

### 3. HPLC Chromatogram showing crude ON-PATA conjugate (after removal from solid support with methanolic ammonia).

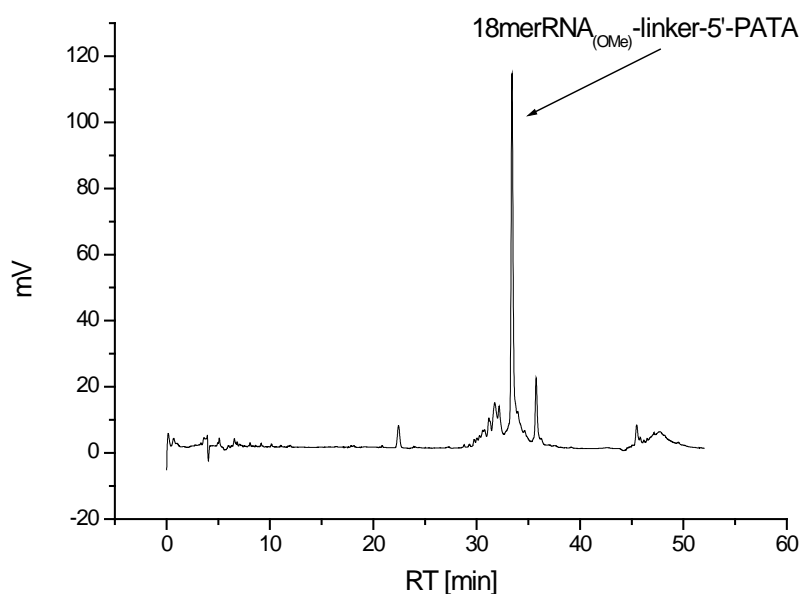

### 4. Mass spectra of ON-PATA conjugate. Molecular weights of the conjugates were reconstructed from the m/z values of the multiply charged ions using the mass deconvolution program (MAXENT)

ES-MS, calculated (M) 6175, found 6173

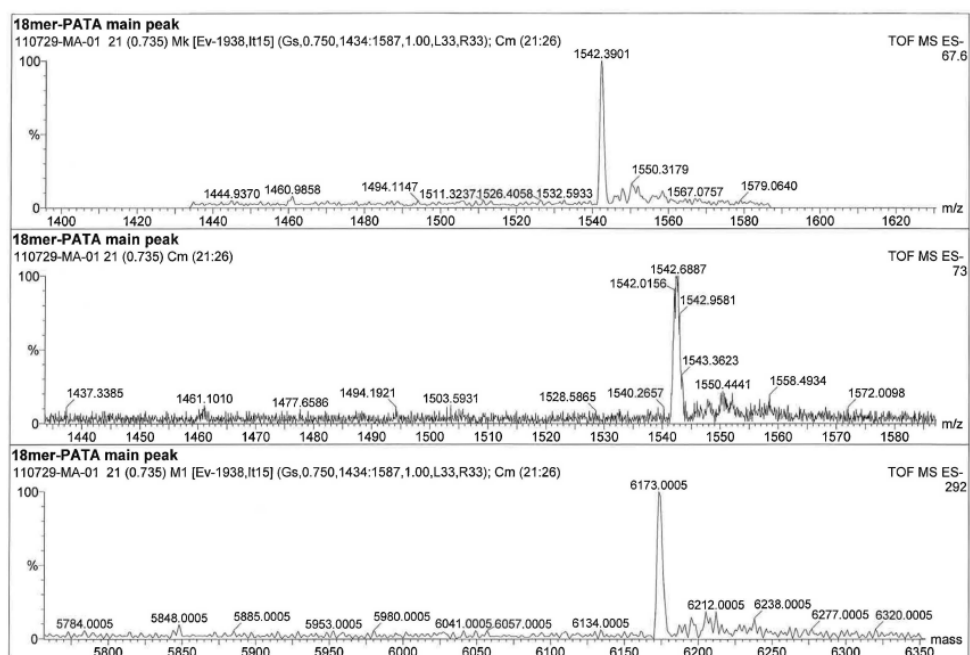

## 5. HPLC Chromatograms showing examples of crude reaction mixtures after conjugation of the 18merRNA with the clickable $m_3G$ -CAP's.

### a) HPLC Chromatogram of crude 18merRNA-CAP2

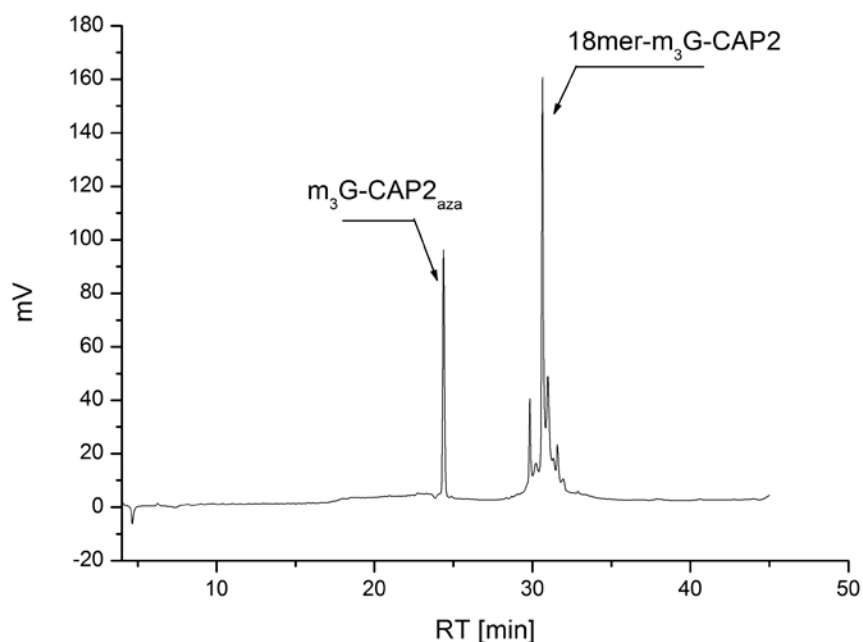

### b) HPLC Chromatogram of crude 18merRNA-CAP3

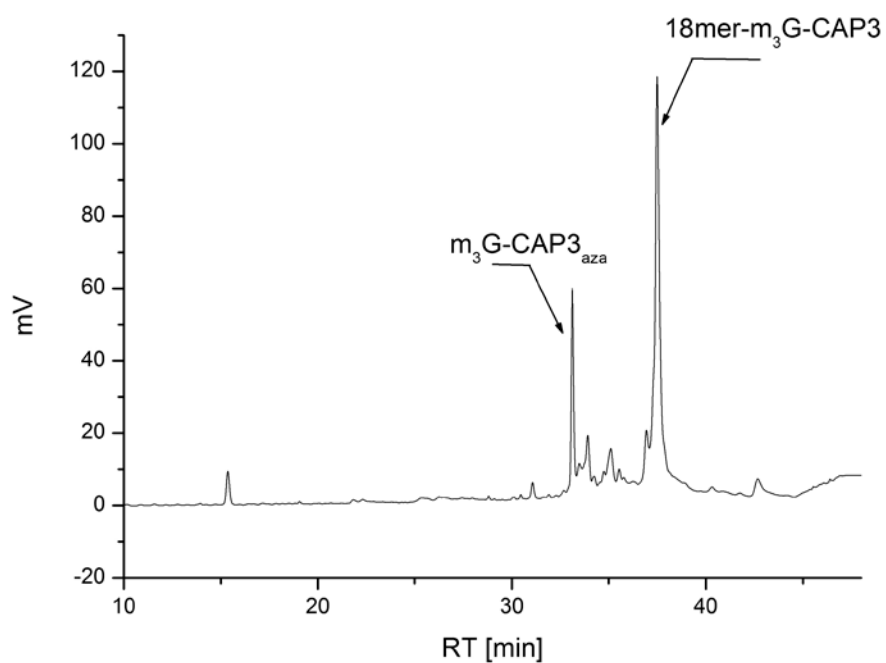

## 6. Mass spectra of m<sub>3</sub>G-CAP(1-4)-ON conjugates.

**18mer-m<sub>3</sub>G-CAP1:** calculated (M) 7120, found 7124 (M).

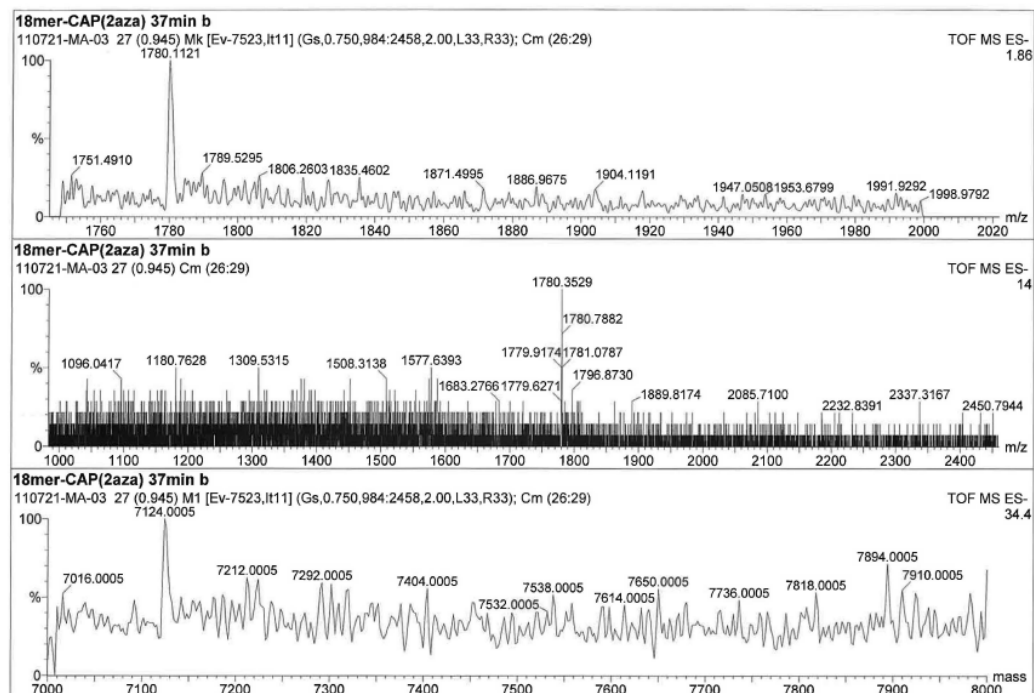

**18mer-m<sub>3</sub>G-CAP2:** calculated (M) 7134, found 7138 (M),

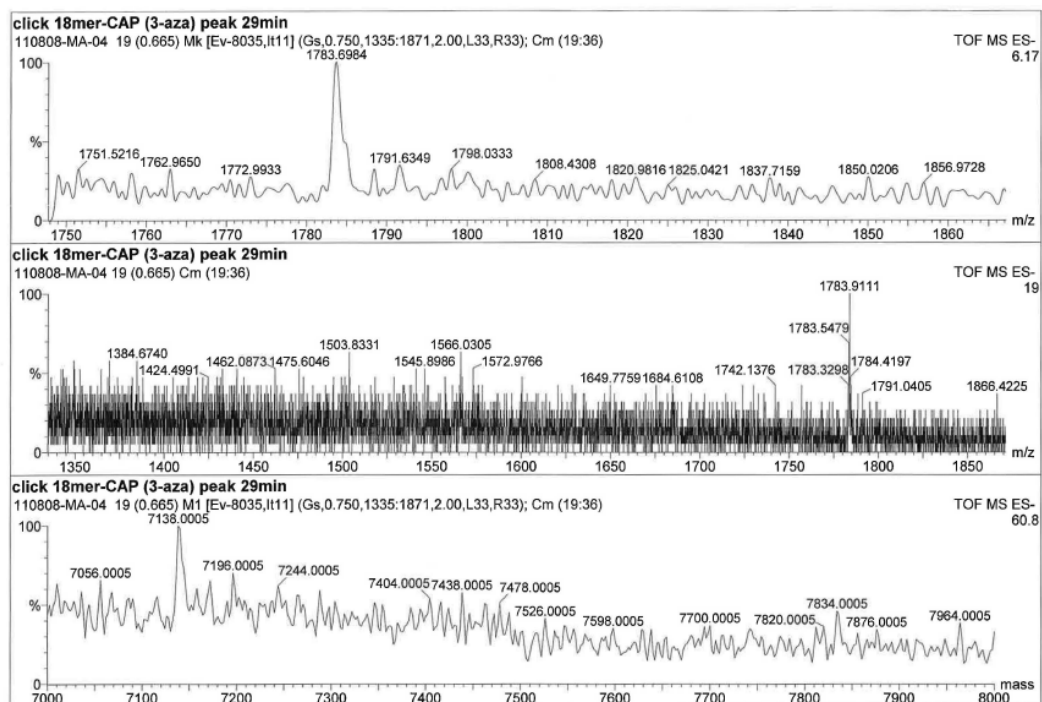

# **18mer-m<sub>3</sub>G-CAP3: calculated (M) 7405, found 7404 (M),**

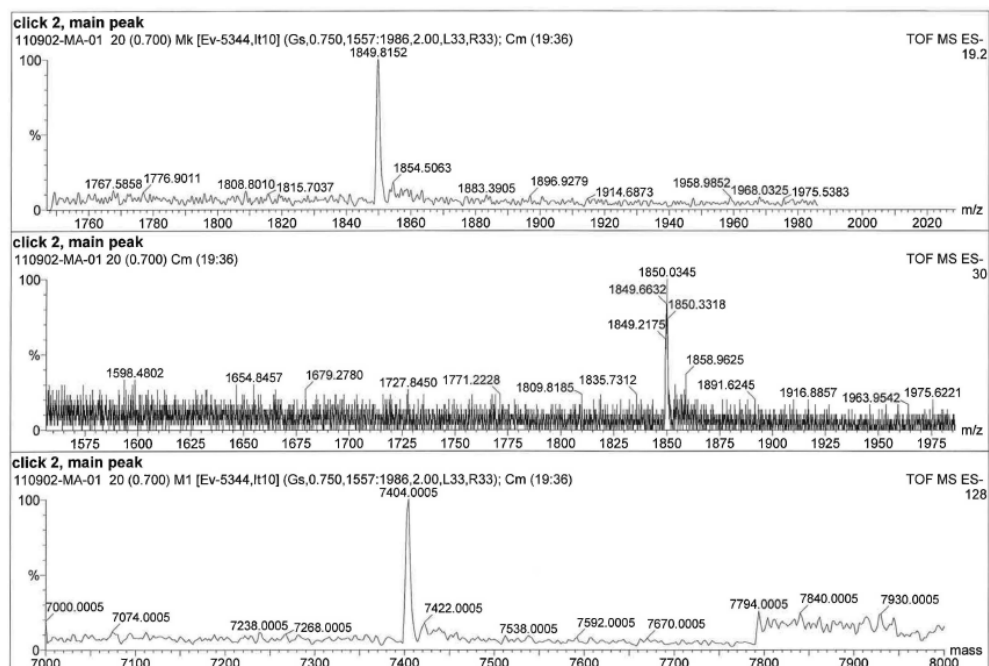

# **18mer-m<sub>3</sub>G-CAP4: calculated (M) 7783, found 7784 (M).**

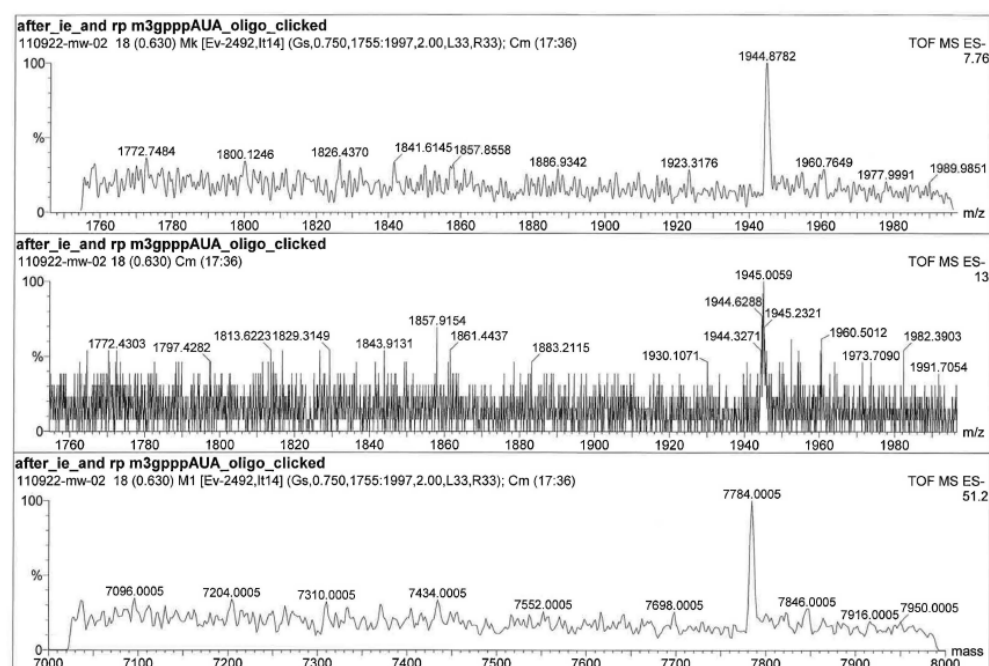

## 7. Mass spectra of 5'-phosphate-AUA(5)-ON conjugate.

ES-MS, calculated (M) 7315, found 7350 (M+K).

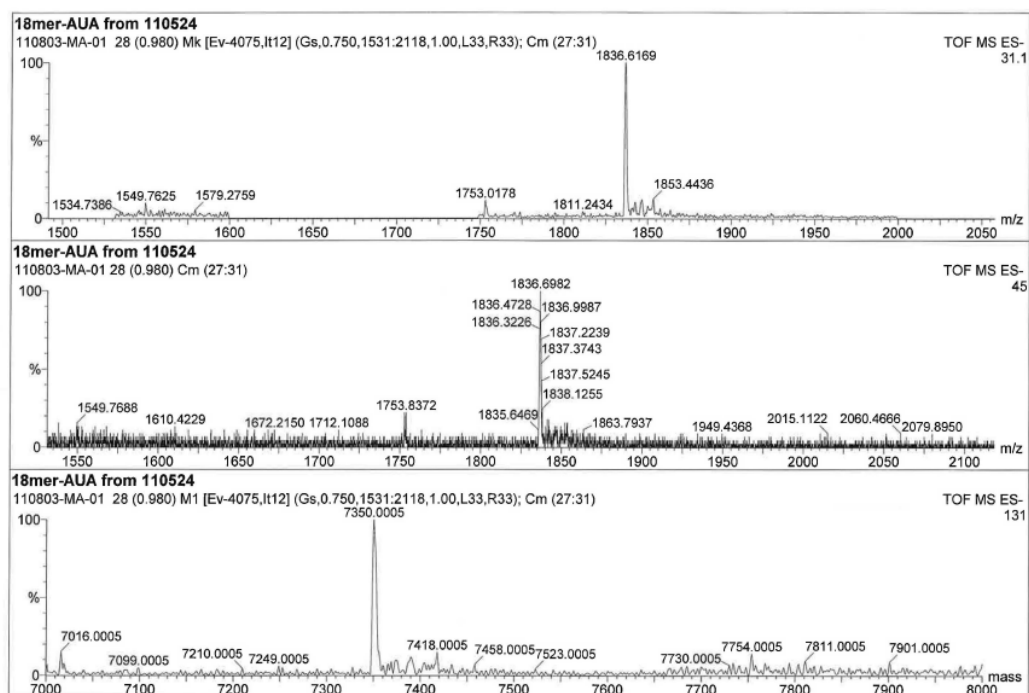

## 8. Mass spectra of compounds 20 and 21.

**Compound 20:**  $m/z$  calculated for  $[M-]$ : 662.23, observed mass: 661.83

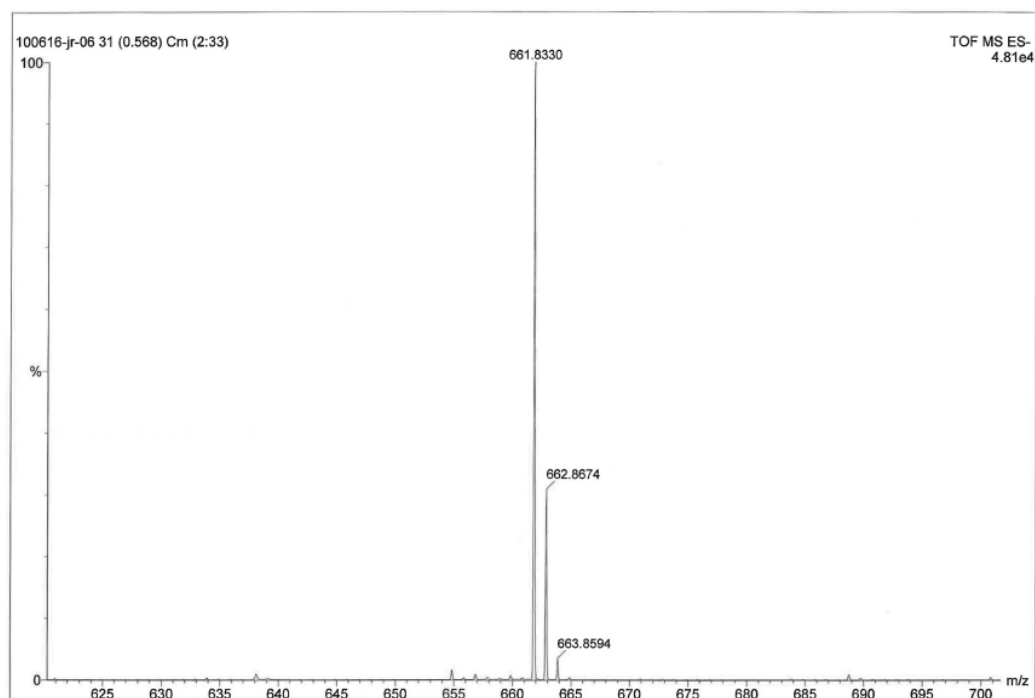

**Compound 21:**  $m/z$  calculated for  $[M-]$ : 742.20, found: 742.03

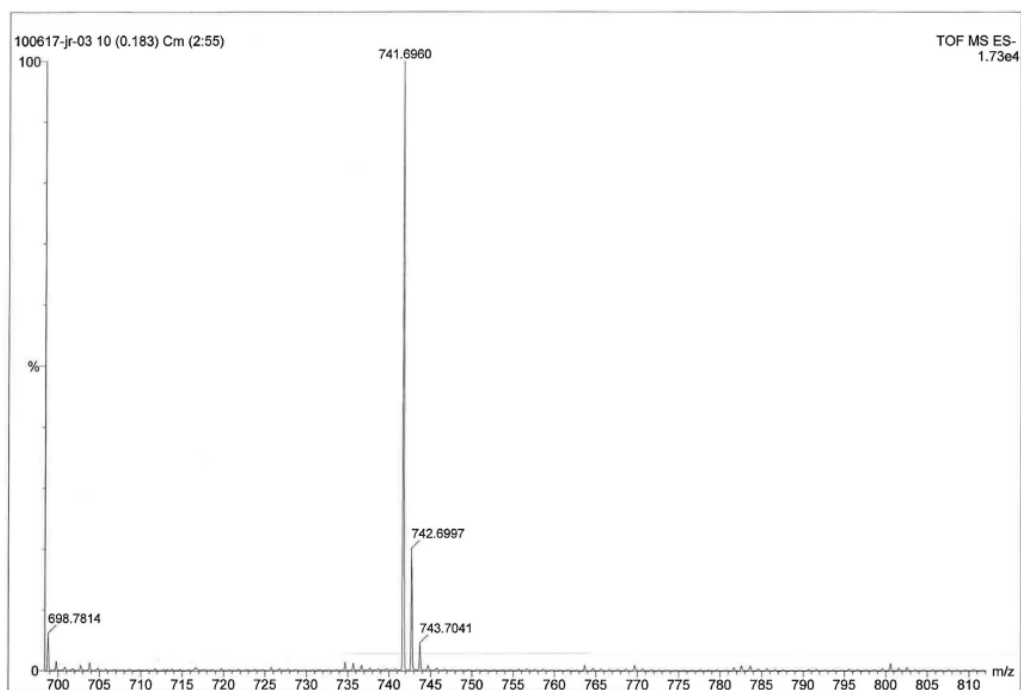

Supplement: c2ra22345g.pdf [file c2ra22345g.pdf]
